# Supplementary material
Source: PubMed Central journal article supplement (PMC3588919)
Supplement: pro0022-0231-sd1.pdf [file pro0022-0231-sd1.pdf]

## **Supplementary information**

### **Chimeragenesis of distantly-related proteins by noncontiguous recombination**

Matthew A. Smith, Philip A. Romero, Timothy Wu, Eric M. Brustad, Frances H. Arnold

Division of Chemistry and Chemical Engineering, California Institute of Technology, Pasadena, CA, 91125, USA.

**Supplementary Table 1** DNA sequence of NcrBgl.

ATGCATCACCACCACCATCACATGAACGTTAAGAAATTC CCAGAAGGCTTCCTGTGGGGCGTTGCGACC  
GCGTCTTACCAGATTGAGGGTTCCCCGCTGGCAGATGGTGC GGGCATGAGCATTGGGCACACCTTTAGC  
CATACCCCGGGTAATGTTAAGAATGGCGATACGGGCGATGTTGCTT GCGACCATTACAATCGTTGGAAA  
GAAGATATTGAGATTATCGAAAAGCTGGGCGTCAAGGCGTACCGCTTCAGCATCTCCTGGCCGCGTATC  
CTGCCGGAAGGCACGGGCCGTGTCAATCAGAAAGGCTGGATTTCTATAACCGCATCATTGACACCCCTG  
CTGGAGAAAGGTATTACCCCGTTTGTCAACCATCTTCCACTGGGATCTGCCGTTTGC GCTGCAACTGAAG  
GGCGGTTTGTGAATCGTGAGATTGCCGATTGGTTCGCAGAGTACAGCCGCGTGCTGTTCGAGA ACTTC  
GGCGACCGTGTCAAGAATTGGATTACCTTTAACGAACCGCTGTGTAGCGCGATTCCGGGTTACGGTTCT  
GGCACGTTTCGCTCCAGGTCGTCAAAGCACGAGCGAGCCGTGGACGGTGGGTCATAACATTC TGGTGGCC  
CACGGTCGTGCGGTCAAGGTCTTTCGTGAAACGGTTAAGGACGGTAAAATCGGTATTGTTCTGAACGGC  
GACTTCACGTACCCGTGGGACGCAGCGGACCCGGCAGACAAAGAGGCCGAGAGCGCCGCTGGAGTTC  
TTCATGCGATGGTTTGCAGACCCGATCTATCTGGCGACTATCCAGCCAGCATGCGTAAGCAGTTGGGT  
GACCGTCTGCCGACCTTTACCCCGGAAGAACGTGCGCTGGTTCACGGTAGCAACGACTTTTACGGTATG  
AACCATTATACCTCGAACTATATCCGCCACCGCTCCAGCCCTGCGTCTGCGGACGATACGGTTGGCAAT  
GTTGATGTGCTGTTTACCAATAAAACAAGGTAAGTGCATTTGGCCCGGAGACTGCGATGCCGTGGCTGCGT  
CCGTGTGCGGCTGGTTTCCGCGACTTCTGGTTTGGATTAGCAAACGTTATGGTTATCCTCCGATCTAT  
GTGACCGAAAATGGTGCGGCCTTCGATGATGTGGTTAGCGAGGATGGTCGCGTTCACGATCAGAATCGT  
ATCGACTACCTGAAAGCATATATCGGTGCAATGGTGACCGCCGTGGAATTGGACGGTGTGAATGTAAAA  
GGTACTTTGTCTGGAGCTTGCTGGATAACTTCGAGTGGGCGGAAGTTACAGCAAGCGTTTTTGGCATC  
GTGTACGTGGATTACAGCACCCAAAAACGCATCGTGAAGGACAGCGGTTATTGGTACTCCAATGTCGTC  
AAAAACAACGGCTTGGAGGACTGA

## Supplementary Table 2 Data collection and refinement statistics for 4GXP

| <b>Data collection</b>                              |                          |
|-----------------------------------------------------|--------------------------|
| Space group                                         | P 31 1 2                 |
| Cell dimensions                                     |                          |
| <i>a</i> , <i>b</i> , <i>c</i> (Å)                  | 115.38, 115.38, 282.54   |
| <i>a</i> , <i>b</i> , <i>g</i> (°)                  | 90.0, 90.0, 120.0        |
| Resolution (Å)                                      | 37.8 – 3.0 (3.00 – 3.15) |
| <i>R</i> <sub>merge</sub>                           | 5.2 (3.8)                |
| <i>I</i> / <i>sI</i>                                | 16.3 (3.3)               |
| Completeness (%)                                    | 99.6 (99.6)              |
| Redundancy                                          | 4.9 (4.8)                |
| <b>Refinement</b>                                   |                          |
| Resolution (Å)                                      | 37.4 - 3.0               |
| No. reflections                                     | 41124                    |
| <i>R</i> <sub>work</sub> / <i>R</i> <sub>free</sub> | 0.24/0.29                |
| No. atoms                                           |                          |
| Protein                                             | 9869                     |
| Ligand/ion                                          | -                        |
| Water                                               | 2                        |
| <i>B</i> -factors                                   |                          |
| Protein                                             | 13.1                     |
| Ligand/ion                                          | -                        |
| Water                                               | -                        |
| R.m.s. deviations                                   |                          |
| Bond lengths (Å)                                    | 0.014                    |
| Bond angles (°)                                     | 1.73                     |

\*All data were collected from a single crystal. Values in parentheses are for highest-resolution shell.
